# Supplementary material for: ARKS: chromosome-scale scaffolding of human genome drafts with linked read kmers
Source: PubMed Central journal article supplement (PMC6011487; doi:10.1186/s12859-018-2243-x), 2018-06-20
Supplement: 12859_2018_2243_MOESM1_ESM.pdf [file 12859_2018_2243_MOESM1_ESM.pdf]

## Additional Information

### Supplemental Tables

**Table S1. Genomic data sources.**

| Species                                | Data type                          | Source                                                                                                                                                                   |
|----------------------------------------|------------------------------------|--------------------------------------------------------------------------------------------------------------------------------------------------------------------------|
| <i>H. sapiens</i><br>NA24143           | 10xG Chromium<br>128/151bp (BAM)   | ftp://ftp-trace.ncbi.nlm.nih.gov/giab/ftp/data/AshkenazimTrio/HG004_NA24143_mother/10Xgenomics_ChromiumGenome/                                                           |
| <i>H. sapiens</i><br>NA24143           | Pacbio Falcon<br>assembly          | ftp://ftp-trace.ncbi.nlm.nih.gov/giab/ftp/data/AshkenazimTrio/analysis/MtSinai_PacBio_Assembly_falcon_03282016/hg004_p_and_a_ctg.fa                                      |
| <i>H. sapiens</i><br>NA24143           | Pacbio Falcon +<br>HiRise assembly | ftp://ftp-trace.ncbi.nlm.nih.gov/giab/ftp/data/AshkenazimTrio/analysis/Dovetail_HiRiseScaffolding_10142016/HG004_hu8E87A9_mother/falcon/hu8E87A9_mother_17Sep2016_z2vEJ/ |
| <i>H. sapiens</i><br>NA12878           | 10xG Chromium<br>2x151bp (raw)     | https://support.10xgenomics.com/de-novo-assembly/datasets/msNA12878/                                                                                                     |
| <i>C. elegans</i><br>Briston N2 Strain | Reference genome                   | https://www.ebi.ac.uk/ena/data/view/DRX007632                                                                                                                            |

**Table S2. Summary of 10x Genomics Chromium datasets used for assemblies and scaffolding.**

| Dataset | Individual/Species | Processing step     | Read pairs    | Read length (bp) | Fold coverage |
|---------|--------------------|---------------------|---------------|------------------|---------------|
| 1       | <i>C. elegans</i>  | Post LongRanger     | 17,000,467    | 128/151          | 50            |
| 2       | NA24143            | Raw reads sequenced | 523,746,206   | 151              | 51.2          |
| 3       | NA24143            | Reads from BAM      | 420,496,741   | 128/151          | 34.9          |
| 4       | NA24143            | Filtered from BAM   | 305,846,648   | 128/151          | 25.3          |
| 5       | NA12878            | Raw reads sequenced | 1,598,106,419 | 151              | 156.3         |
| 6       | NA12878            | Post Long Ranger    | 1,514,291,941 | 128/151          | 136.8         |

**Table S3. Summary of draft assemblies used for scaffolding with linked reads.** The total number of scaffolds is denoted by ‘n’, and the number of scaffolds 500 bp and longer is denoted by ‘n:500’.

| Dataset                     | n     | n:500 | Largest scaffold (Mbp) | NG50 (Mbp) | Misassemblies |
|-----------------------------|-------|-------|------------------------|------------|---------------|
| <i>C. elegans</i> Supernova | 9505  | 2397  | 1.02                   | 0.27       | 175           |
| NA12878 Supernova           | 21774 | 21774 | 57.01                  | 14.74      | 1316          |
| Pacbio Falcon               | 16487 | 16385 | 22.58                  | 4.56       | 3100          |
| Pacbio Falcon + HiRise      | 15576 | 15474 | 65.72                  | 14.53      | 3477          |

**Table S4. Contiguity and Quast summary of scaffolding a *C. elegans* Supernova assembly.** Scaffolding of the draft assembly was performed with ARCS (*-s 98 -c 8 -z 500 -m 8-10000 -e 30000*), ARKS (*-c 8 -j 0.5 -t 8 -z 500 -m 8-10000 -e 30000*), fragScaff (*-m 500 -C 8 -t 8*) and Architect (*--rc-abs-thr 5, --rc-rel-edge-thr* and *--rc-rel-prun-thr* abbreviated to “E” and “P” respectively). The most contiguous assemblies for each tool are indicated in bold. The total number of scaffolds is denoted by ‘n’, and the number of scaffolds 500 bp and longer is denoted by ‘n:500’.

| Tool             | Parameters                | n           | n:500       | NG50 (kbp)     | NGA50 (kbp)   | Largest Scaffold (kbp) | Number of relocation misassemblies | Number of non-relocation misassemblies | Total number of misassemblies |
|------------------|---------------------------|-------------|-------------|----------------|---------------|------------------------|------------------------------------|----------------------------------------|-------------------------------|
| ARKS             | k40, a0.3                 | 9123        | 2015        | 926.03         | 386.81        | 3486.04                | 148                                | 61                                     | 209                           |
| ARKS             | k40, a0.5                 | 9041        | 1933        | 1033.58        | 422.14        | 3519.47                | 154                                | 64                                     | 218                           |
| ARKS             | k60, a0.3                 | 9122        | 2014        | 891.71         | 386.81        | 3485.04                | 148                                | 61                                     | 209                           |
| <b>ARKS</b>      | <b>k60, a0.5</b>          | <b>9039</b> | <b>1931</b> | <b>1105.94</b> | <b>448.85</b> | <b>3519.47</b>         | <b>155</b>                         | <b>62</b>                              | <b>217</b>                    |
| ARKS             | k80, a0.3                 | 9127        | 2019        | 891.71         | 386.81        | 3485.04                | 147                                | 60                                     | 207                           |
| ARKS             | k80, a0.5                 | 9045        | 1937        | 1093.53        | 420.37        | 3519.47                | 153                                | 62                                     | 215                           |
| ARCS             | s98, a0.3                 | 9124        | 2016        | 966.77         | 384.80        | 3485.04                | 146                                | 61                                     | 207                           |
| <b>ARCS</b>      | <b>s98, a0.5</b>          | <b>9053</b> | <b>1945</b> | <b>1064.52</b> | <b>410.97</b> | <b>3485.04</b>         | <b>147</b>                         | <b>60</b>                              | <b>207</b>                    |
| fragScaff        | E13508, j1, u2            | 8798        | 1690        | 661.59         | 292.34        | 2502.12                | 398                                | 77                                     | 475                           |
| fragScaff        | E13508, j3, u2            | 8255        | 1147        | 1025.35        | 273.79        | 2504.56                | 771                                | 88                                     | 859                           |
| <b>fragScaff</b> | <b>E13508, j6.5, u2.5</b> | <b>8098</b> | <b>990</b>  | <b>1040.03</b> | <b>267.86</b> | <b>2504.56</b>         | <b>842</b>                         | <b>117</b>                             | <b>959</b>                    |
| fragScaff        | E30000, j1, u2            | 8928        | 1820        | 556.28         | 257.55        | 1952.43                | 399                                | 73                                     | 472                           |
| fragScaff        | E30000, j3, u2            | 8305        | 1197        | 734.06         | 259.48        | 2192.74                | 802                                | 93                                     | 895                           |
| fragScaff        | E30000, j6.5, u2.5        | 8120        | 1012        | 833.03         | 249.24        | 3065.20                | 892                                | 137                                    | 1029                          |
| <b>Architect</b> | <b>E0.2, P0.1</b>         | <b>9206</b> | <b>2098</b> | <b>410.62</b>  | <b>174.28</b> | <b>1332.84</b>         | <b>355</b>                         | <b>99</b>                              | 454                           |
| Architect        | E0.2, P0.2                | 9206        | 2098        | 410.62         | 174.28        | 1332.84                | 355                                | 99                                     | 454                           |
| Architect        | E0.3, P0.1                | 9222        | 2114        | 392.94         | 174.28        | 1332.84                | 343                                | 95                                     | 438                           |
| Architect        | E0.3, P0.2                | 9222        | 2114        | 392.94         | 174.28        | 1332.84                | 343                                | 95                                     | 438                           |

**Table S5. Contiguity and accuracy of scaffolding a Supernova assembly of the NA12878 individual.** Scaffolding of the baseline assembly was attempted using ARCS (*-s 98 -c 5 -m 50-6000 -z 3000 -e 30000*), ARKS (*-t 8 -c 5 -j 0.5 -z 3000 -e 30000 -m 50-6000*), fragScaff (*-E 30000*) and Architect (*--rc-abs-thr 5, --rc-rel-edge-thr* and *--rc-rel-prun-thr* abbreviated to “E” and “P” respectively). Assemblies indicated in bold are plotted in Fig. 2A, and the assembly indicated in italics is plotted in Fig. 2B and Fig. 3. The number of scaffolds 500 bp and longer is denoted by ‘n:500’.

| Tool             | Parameters        | n:500        | NG50 (Mbp)   | NGA50 (Mbp) | Largest scaffold (Mbp) | Number of misassemblies |
|------------------|-------------------|--------------|--------------|-------------|------------------------|-------------------------|
| ARKS             | k80, a0.3         | 21353        | 23.35        | 8.28        | 74.87                  | 1363                    |
| ARKS             | k80, a0.5         | 21183        | 25.56        | 8.47        | 101.33                 | 1447                    |
| <b>ARKS</b>      | <b>k100, a0.3</b> | <b>21360</b> | <b>25.32</b> | <b>8.28</b> | <b>74.87</b>           | <b>1359</b>             |
| <i>ARKS</i>      | <i>k100, a0.5</i> | <i>21207</i> | <i>25.94</i> | <i>8.47</i> | <i>101.33</i>          | <i>1441</i>             |
| ARCS             | s98, a0.3         | 21366        | 20.21        | 8.10        | 86.94                  | 1363                    |
| ARCS             | s98, a0.5         | 21192        | 23.09        | 8.45        | 86.94                  | 1473                    |
| fragScaff        | j1, u2            | 20829        | 19.06        | 7.73        | 106.43                 | 1791                    |
| fragScaff        | j1.75, u2.5       | 20321        | 19.48        | 8.05        | 138.11                 | 2147                    |
| fragScaff        | j3, u2.5          | 19231        | 23.37        | 8.06        | 144.37                 | 2889                    |
| <b>Architect</b> | <b>E0.2, P0.1</b> | <b>21439</b> | <b>15.05</b> | <b>7.17</b> | <b>57.01</b>           | <b>1452</b>             |
| Architect        | E0.2, P0.2        | 21439        | 15.05        | 7.17        | 57.01                  | 1452                    |
| Architect        | E0.3, P0.1        | 21558        | 14.99        | 7.17        | 57.01                  | 1373                    |
| Architect        | E0.3, P0.2        | 21558        | 14.99        | 7.17        | 57.01                  | 1373                    |

**Table S6. Reconstruction of the human chromosomes in a baseline and ARKS-scaffolded NA12878 Supernova assembly.** ARKS scaffolding of the baseline Supernova assembly was run with parameters -k100 -j0.5 -c5 -e30000 -z3000 -m50-6000 -r0.05 -a0.5. Scaffolds from scaffolds comprising 85% (NG85) of the human genome were aligned to the GRCh8 reference genome using BWA mem [16]. The number of NG85 scaffolds covering each human chromosome, as well as the proportion of chromosome bases reconstructed by the scaffolds is shown for both assemblies.

| Chromosome (sorted by #ARKS scaffolds) | Chromosome sizes (bp) | Number of Supernova (baseline) scaffolds | Sum scaffolds (bp)   | Proportion of chromosome bases | Number of ARKS scaffolds | Sum scaffolds (bp)   | Proportion of chromosome bases |
|----------------------------------------|-----------------------|------------------------------------------|----------------------|--------------------------------|--------------------------|----------------------|--------------------------------|
| 22                                     | 51,304,566            | 1                                        | 24,215,165           | 47.2%                          | 1                        | 27,282,874           | 53.2%                          |
| 18                                     | 78,077,248            | 3                                        | 68,423,482           | 87.6%                          | 1                        | 59,423,916           | 76.1%                          |
| 21                                     | 48,129,895            | 2                                        | 34,048,769           | 70.7%                          | 2                        | 46,767,013           | 97.2%                          |
| 20                                     | 63,025,520            | 3                                        | 59,048,262           | 93.7%                          | 2                        | 59,155,152           | 93.9%                          |
| 14                                     | 107,349,540           | 9                                        | 85,454,580           | 79.6%                          | 3                        | 85,617,403           | 79.8%                          |
| 16                                     | 90,354,753            | 10                                       | 63,227,333           | 70.0%                          | 4                        | 61,095,856           | 67.6%                          |
| 15                                     | 102,531,392           | 9                                        | 66,742,796           | 65.1%                          | 4                        | 68,637,871           | 66.9%                          |
| 12                                     | 133,851,895           | 10                                       | 128,061,560          | 95.7%                          | 4                        | 143,935,983          | >100%                          |
| 8                                      | 146,364,022           | 7                                        | 137,079,992          | 93.7%                          | 4                        | 140,829,075          | 96.2%                          |
| 13                                     | 115,169,878           | 8                                        | 91,847,141           | 79.7%                          | 5                        | 94,935,687           | 82.4%                          |
| 10                                     | 135,534,747           | 16                                       | 127,358,990          | 94.0%                          | 5                        | 121,023,411          | 89.3%                          |
| 19                                     | 59,128,983            | 10                                       | 47,734,830           | 80.7%                          | 6                        | 51,904,974           | 87.8%                          |
| 17                                     | 81,195,210            | 10                                       | 59,702,612           | 73.5%                          | 6                        | 65,400,117           | 80.5%                          |
| 6                                      | 171,115,067           | 9                                        | 163,124,836          | 95.3%                          | 6                        | 166,383,411          | 97.2%                          |
| 5                                      | 180,915,260           | 16                                       | 162,876,761          | 90.0%                          | 6                        | 161,153,829          | 89.1%                          |
| 3                                      | 198,022,430           | 10                                       | 193,056,108          | 97.5%                          | 6                        | 192,350,549          | 97.1%                          |
| 9                                      | 141,213,431           | 12                                       | 105,102,562          | 74.4%                          | 7                        | 105,817,983          | 74.9%                          |
| 2                                      | 243,199,373           | 10                                       | 223,472,329          | 91.9%                          | 7                        | 221,709,120          | 91.2%                          |
| X                                      | 155,270,560           | 19                                       | 138,639,674          | 89.3%                          | 7                        | 131,154,173          | 84.5%                          |
| 11                                     | 135,006,516           | 15                                       | 122,992,987          | 91.1%                          | 8                        | 120,078,009          | 88.9%                          |
| 7                                      | 159,138,663           | 21                                       | 136,109,115          | 85.5%                          | 8                        | 114,034,203          | 71.7%                          |
| 4                                      | 191,154,276           | 14                                       | 181,377,511          | 94.9%                          | 8                        | 179,479,799          | 93.9%                          |
| 1                                      | 249,250,621           | 22                                       | 206,851,096          | 83.0%                          | 13                       | 209,511,935          | 84.1%                          |
| Y                                      | 59,373,566            | NA                                       | NA                   | NA                             | NA                       | NA                   | NA                             |
| <b>Total</b>                           | <b>3,036,303,846</b>  | <b>246</b>                               | <b>2,626,548,491</b> | <b>86.5%</b>                   | <b>123</b>               | <b>2,627,682,343</b> | <b>86.5%</b>                   |

**Table S7. Baseline ABySS NA24143 contig assembly metrics.** The number of scaffolds 500 bp and longer is denoted by ‘n:500’.

| n:500   | NG50 (kbp) | N50 (kbp) | Largest scaffold (kbp) |
|---------|------------|-----------|------------------------|
| 156,178 | 50.35      | 56.71     | 519.08                 |

**Table S8. Contiguity and benchmarking analysis of scaffolding ABySS NA24143 contigs with ARKS.** ARKS was run with parameters `-c 5 -k 100 -j 0.5 -z 3000 -m 50-1000 -e 30000 -t 8 -a 0.3`. The number of scaffolds 500 bp and longer is denoted by ‘n:500’.

| n:500   | NG50 (kbp) | N50 (kbp) | Largest scaffold (bp) | Wall clock time (h) | Peak memory (GB) |
|---------|------------|-----------|-----------------------|---------------------|------------------|
| 144,906 | 81.81      | 103.59    | 1,092,413             | 20.33               | 186.63           |

**Table S9. Wall clock time and peak memory usage for scaffolding the Supernova *C. elegans* base assembly with ARKS, ARCS, fragScaff and Architect.** Benchmarking for the most contiguous assemblies are shown. ARKS, fragScaff and the BWA mem [16] alignments were run using eight threads, while ARCS and Architect are single-threaded. The peak memory step for ARCS, fragScaff and Architect was the alignments of the linked reads to the draft assembly, while the peak memory step for ARKS was the main scaffolding pipeline.

| Tool      | Wall clock time (min) | Peak Memory (GB) |
|-----------|-----------------------|------------------|
| ARKS      | 11.08                 | 1.42             |
| ARCS      | 40.08                 | 1.26             |
| fragScaff | 43.02                 | 1.26             |
| Architect | 51.42                 | 1.26             |

**Table S10. Wall clock time and peak memory usage for scaffolding the Supernova NA12878 draft assembly with ARKS, ARCS, fragScaff and Architect.** Benchmarking for the most contiguous assemblies are shown. ARKS, fragScaff and the BWA mem [16] alignments were run using eight threads, while ARCS and Architect are single-threaded.

| Tool      | Wall clock time (h) | Peak Memory (GB) |
|-----------|---------------------|------------------|
| ARKS      | 10.50               | 6.68             |
| ARCS      | 58.90               | 6.42             |
| fragScaff | 71.28               | 24.89            |
| Architect | 96.89               | 34.40            |

**Table S11. Wall clock time and peak memory usage for scaffolding the NA24143 Falcon+HiRise draft assembly with ARKS.** Benchmarking for the most contiguous assembly is shown.

|                     |      |
|---------------------|------|
| Wall clock time (h) | 3.85 |
| Peak memory (GB)    | 7.19 |

**Table S12. Assembly contiguity and breakpoint analysis of ARKS scaffolding of a Pacbio Falcon assembly scaffolded with Hi-C/HiRise.** Tigmint was run with parameters  $w=2000$   $n=2$  and ARKS was run with parameters  $-t$  8  $-c$  5  $-j$  0.5  $-z$  3000  $-e$  30000  $-m$  50-1000. Assemblies indicated in bold are plotted in Fig. 5. The number of scaffolds 500 bp and longer is denoted by ‘n:500’.

| Assembly                                | ARKS Parameters  | n:500        | NG50 (Mbp)   | NGA50 (Mbp)  | Largest scaffold (Mbp) | Number of misassemblies |
|-----------------------------------------|------------------|--------------|--------------|--------------|------------------------|-------------------------|
| <b>Falcon</b>                           | N/A              | <b>16385</b> | <b>4.56</b>  | <b>4.11</b>  | <b>22.58</b>           | <b>3100</b>             |
| <b>Falcon + ARKS</b>                    | <b>k40, a0.3</b> | <b>15551</b> | <b>15.00</b> | <b>7.92</b>  | <b>70.49</b>           | <b>3314</b>             |
| Falcon + ARKS                           | k60,a0.3         | 15680        | 12.99        | 7.57         | 62.81                  | 3247                    |
| <b>Falcon + Tigmint + ARKS</b>          | <b>k40,a0.3</b>  | <b>16480</b> | <b>16.71</b> | <b>10.02</b> | <b>70.49</b>           | <b>3053</b>             |
| Falcon + Tigmint + ARKS                 | k60,a0.3         | 16598        | 15.06        | 9.90         | 67.20                  | 3031                    |
| <b>Falcon + HiRise</b>                  | N/A              | <b>15474</b> | <b>14.53</b> | <b>8.15</b>  | <b>65.72</b>           | <b>3477</b>             |
| Falcon + HiRise + Tigmint               | N/A              | 16463        | 13.94        | 8.15         | 59.63                  | 3353                    |
| <b>Falcon + HiRise + ARKS</b>           | <b>k40, a0.3</b> | <b>15118</b> | <b>23.09</b> | <b>9.26</b>  | <b>104.20</b>          | <b>3612</b>             |
| Falcon + HiRise + ARKS                  | k60, a0.3        | 15227        | 23.09        | 9.42         | 104.20                 | 3538                    |
| <b>Falcon + HiRise + Tigmint + ARKS</b> | <b>k40, a0.3</b> | <b>16080</b> | <b>30.01</b> | <b>10.02</b> | <b>104.20</b>          | <b>3471</b>             |
| Falcon + HiRise + Tigmint + ARKS        | k60, a0.3        | 16193        | 28.46        | 10.02        | 104.20                 | 3413                    |

## Supplemental Figures

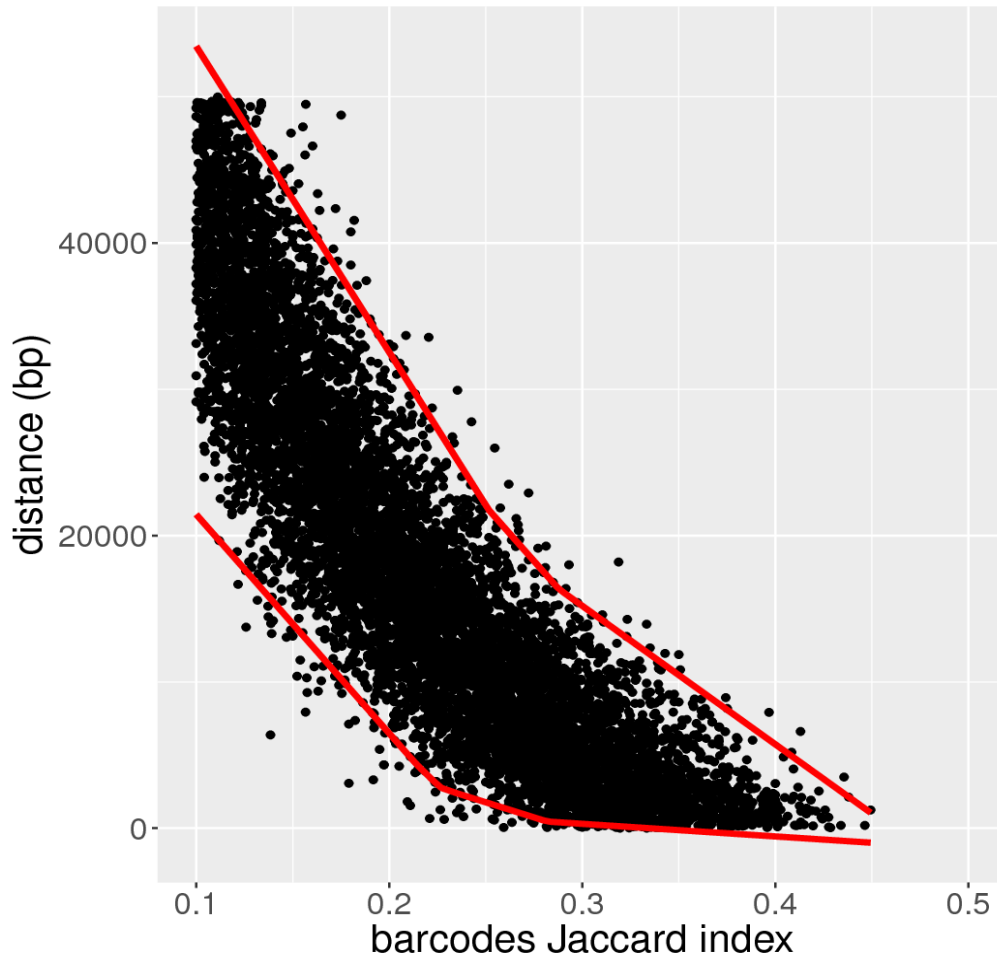

**Figure S1. Gap size estimation in ARKS.** To parameterize the relationship between number of shared barcodes and distance, ARKS measures the distance between head and tail regions of the same contig and records the corresponding barcode Jaccard index. Here, we show an example set of intra-contig distance/barcode samples for Chromium reads mapping to ABySS assembly of the NA24143 dataset, using ARKS parameters ``-c5 -e30000 -z3000 -m50-1000``. Minimum and maximum distance bounds are estimated using the 1st and 99th percentile of the observations (red lines).

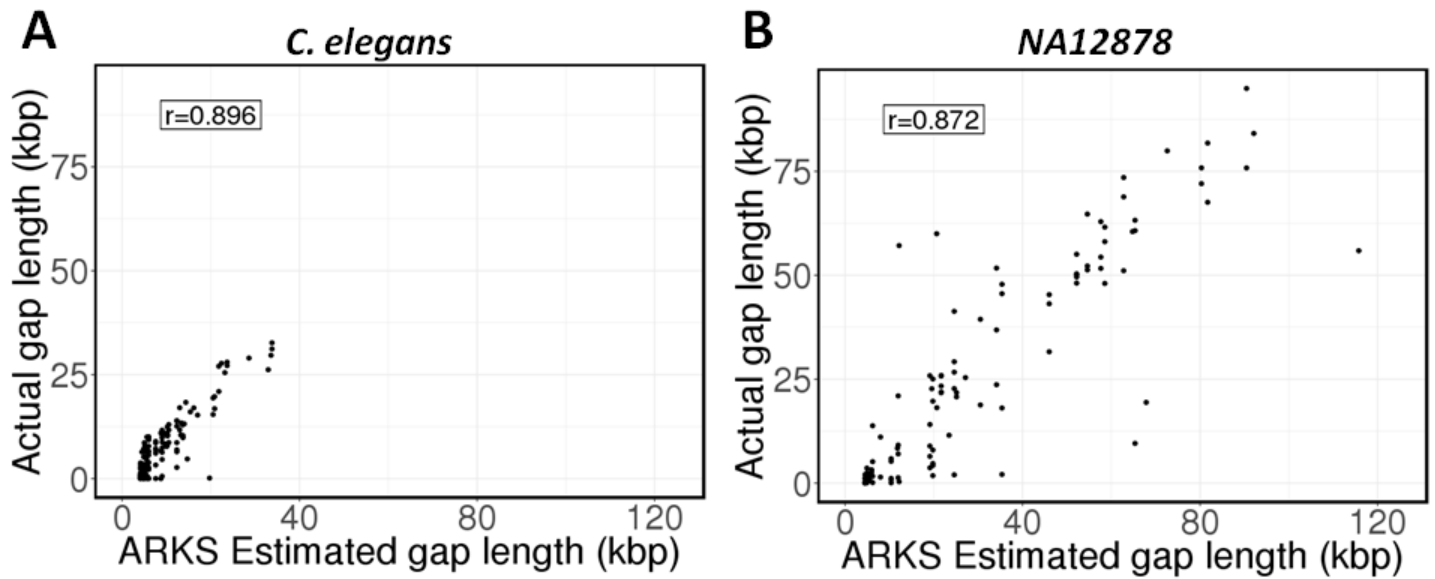

**Figure S2. ARKS gap distance estimation analysis.** In separate experiments, ARKS was run on the (A) *C. elegans* (-D -c 8 -z 500 -m 8-10000 -e 30000 -k 60 -a 0.5 -j 0.5) and (B) NA12878 (-D -c 5 -e 30000 -z 3000 -m 50-6000 -k 60 -a 0.5 -j 0.5) Supernova assemblies, using the gap distance estimation option. The ground truth (Actual gap length) was derived from aligning adjacent contigs within a scaffold, to their respective reference genome sequence. The Pearson correlation coefficient ( $r$ ) was calculated using the ARKS-estimated and actual distances for both datasets.
